# Supplementary material for: Preclinical Characterization of OSI-027, a Potent and Selective Inhibitor of mTORC1 and mTORC2: Distinct from Rapamycin
Source: Oxford University Press journal article supplement (doi:10.1158/1535-7163.mct-10-1099), 2011-06-15
Supplement: 15357163mct101099-sup-smethods.pdf [file 15357163mct101099-sup-smethods.pdf]

## Supplementary Methods

**Cell line derivation.** MDA-MB-231 (NCI, 01/06), MDA-MB-435 (NCI, 01/06), PC-3 (NCI, 01/06), OVCAR-3 (ATCC, 06/87), A549 (ATCC, 12/02), DU 145 (04/89), NCI-H2122 (ATCC, 10/04), U-87 MG (ATCC, 07/93), ACHN (ATCC, 04/06), MDA-MB-468 (ATCC, 01/88), MCF-7 (ATCC, 03/86), BT-474 (ATCC, 12/87), IGR-OV1 (NCI, 01/06), RL95-2 (ATCC, 08/06), RT4 (ATCC, 08/06), C-33A (ATCC, 10/97), HCC70 (09/06), HCC1954 (ATCC, 09/06), BT-20 (ATCC, 06/90), A2780 (ECACC, 07/04), SCC-4 (ATCC, 10/06), OVCAR5 (NCI, 01/06), SK-OV-3 (ATCC, 09/91), HCT 116 (PFIZER, 01/92), NCI-H292 (ATCC, 11/02), NCI-H460 (ATCC, 04/01), RL (ATCC, 06/08), FaDu (ATCC, 06/05), COLO 205 (ATCC, 05/85), GEO (RPCI, 04/04), 786-0 (ATCC, 11/06), PANC-1 (ATCC, 01/00), HT-1080 (ATCC, 11/96), SW620 (ATCC, 04/90) and NCI-H23 (ATCC, 03/04). Rh1, Rh1mTORrr, Rh30, Rh30/mTORrr and Rh30/Rapa10K cells (Dr Peter Houghton, SJCRH)

**Sandwich ELISA assay to measure p-4E-BP1 (T37/46).** BT-474 cells were treated with OSI-027 in a concentration-dependent fashion for 2h in a 96-well plate and whole cell lysates were transferred to another plate coated with total 4E-BP1 goat antibody (Santa Cruz Biotechnology, sc-6024) and incubated overnight at 4°C. Phospho-4E-BP1 bound to total 4E-BP1 was detected using p4E-BP1(T37/46) rabbit antibody and anti-rabbit HRP conjugated secondary antibody by chemiluminescence method. Luminescence signals of positive control, negative control and treated samples were used to calculate % inhibition and IC<sub>50</sub> value.

**Sandwich ELISA assay to measure pAKT (S473).** BT-474 cells were treated with OSI-027 in a concentration-dependent fashion for 2h in a 96-well plate and whole cell lysates were analyzed for pAKT (S473) using Pathscan Phospho-AKT1 (S473) chemiluminescent ELISA kit from Cell Signaling Technology (cat# 7134). Luminescence signals of positive control, negative control and treated samples were used to calculate % inhibition and IC<sub>50</sub> value.

**Measurement of PK.** Female CD-1 mice (5-8 weeks) were obtained from Charles River, and housed in an AALAC accredited animal facility. Animals were dosed with OSI-027 by oral gavage. The dose solutions were prepared by dissolving the sodium salt of OSI-027 in water by sonication, and were administered at 10 mL/kg. Plasma samples at multiple time points were obtained by cardiac puncture following euthanasia, and were analyzed by HPLC-MS/MS (Applied Biosystems 3000 mass spectrometer with Agilent 1100 HPLC) to determine the concentrations of OSI-027. Pharmacokinetic parameters were determined by noncompartmental modeling of the median (n=3) concentration data at each time point.

## **Supplementary Figure Legends**

**Supplementary Figure S1. Biochemical selectivity profile of OSI-027 against PI3K related kinases and other kinases.** mTOR (native complex) assay was done at 1 mM ATP and all other kinases were tested at 100  $\mu$ M ATP. mTOR (native complex), mTORC1 (native complex), mTORC2 (native complex) and PI3K $\beta$  assays were done in-house and all other kinases were tested at Invitrogen using their Selectscreen kinase profiling service.

**Supplementary Figure S2. Inhibition of pAKT (S473) and pAKT (T308) by OSI-027 in MDA-MB-231 stimulated with insulin.** MDA-MB-231 cells were serum starved overnight and OSI-027 was added to cells at varying concentrations. After 2h incubation cells were growth factor stimulated with 10 ng/mL insulin for 3 to 5 minutes, then rinsed with cold PBS and lysed for western blot analysis

**Supplementary Figure S3. Mechanistic cell potency of OSI-027 in Sandwich ELISA assays.** IC<sub>50</sub> value of OSI-027 in BT474 breast cancer cell line for p-4E-BP1 (T37/46) and pAKT (S473) inhibition was determined as described under 'supplementary methods'

**Supplementary Figure S4. Inhibition of IGF-1 stimulated pAKT (S473) by OSI-027 and not rapamycin in NCI-H460 NSCLC cells.** Serum starved NCI-H460 cells were treated with OSI-027 (20  $\mu$ M) and rapamycin (20  $\mu$ M) for 24h and in the presence and absence of IGF-1 (10 ng/mL). Whole cell lysates was analyzed by WB for pAKT (S473).

**Supplementary Figure S5. Anti-proliferative effects of rapamycin.** Rapamycin-sensitive cell lines (IC<sub>50</sub> <0.07  $\mu$ M) were treated with rapamycin for 72h in a dose-dependent manner. Relative cell viabilities are measured using Cell TiterGlo and plotted as % DMSO control using Prism.

**Supplementary Figure S6. Mouse PK of OSI-027 at 20 mpk, 100 mpk and 200 mpk.** Pharmacokinetic parameters (C<sub>max</sub> and AUC) were determined by noncompartmental modeling of the median (n=3) concentration data at each time point.

**Supplementary Figure S7. Western blot analysis of PD markers (p4E-BP1 and pAKT) in tumor lysates from MDA-MB-231 PD study (OSI-027, 60 mpk single dose).**

**Supplementary Figure S8. (A) PK-PD Correlation of OSI-027 in MDA-MB-231 PD model (OSI-027, 25 mg/kg, single dose) (B) Western blot analysis of PD markers (p4E-BP1 and pAKT) in tumor lysates from MDA-MB-231 PD study (OSI-027, 25 mg/kg, single dose)**

**Supplementary Figure S9. Western blot analysis of COLO 205 tumor lysates harvested at 8 & 24h after 14 day dosing with OSI-027 (65 mg/kg) or rapamycin (20 mg/kg).**
